# Supplementary material for: Same Brain, Different Look?—The Impact of Scanner, Sequence and Preprocessing on Diffusion Imaging Outcome Parameters
Source: MDPI journal article supplement (doi:10.3390/jcm10214987), 2021-10-27
Supplement: s1 [file s1]

# Supplementary

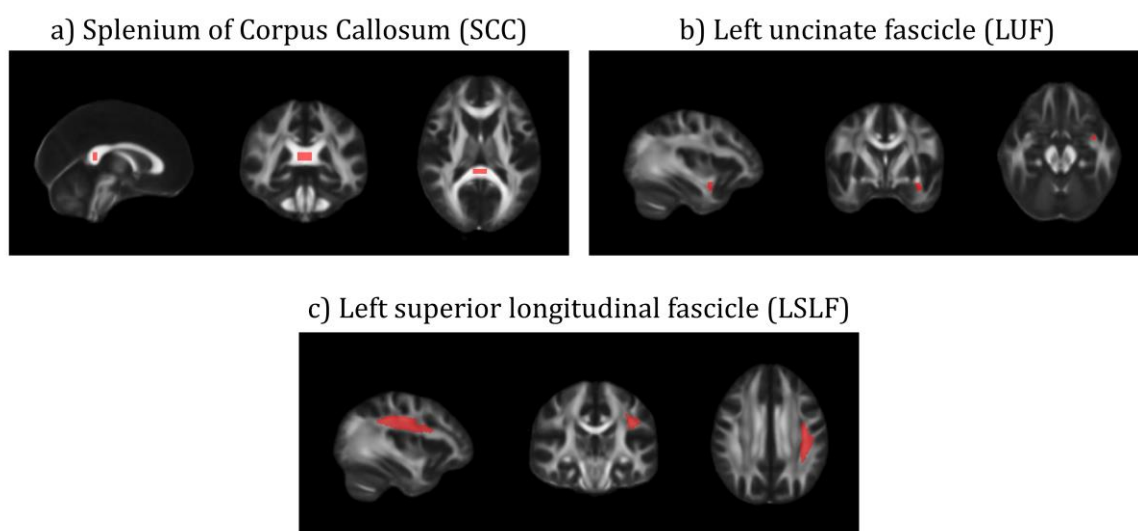

**Figure S1.** ROIs selected for ROI-based analyses.

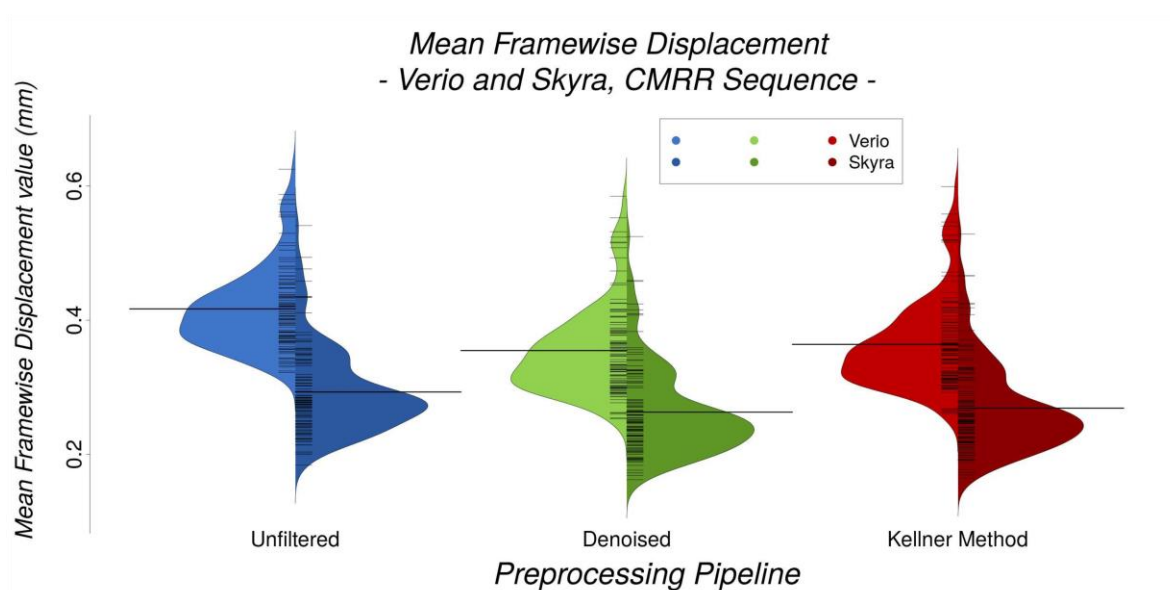

**Figure S2.** Motion effects quantified as mean frame-wise displacement (Verio and Skyra, CMRR sequence,  $n = 115$ ) differ between preprocessing pipelines

**Negative age effect on FA compared between scanners  
- preprocessed with "unringing" -**

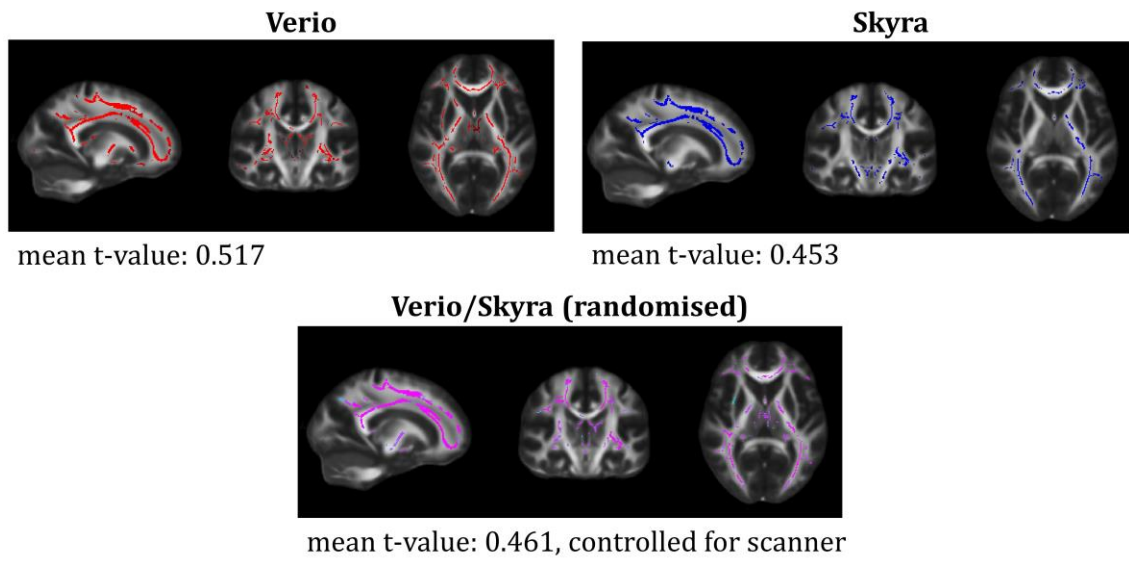

**Figure S3.** TBSS results of the negative age effect on the whole brain WM skeleton compared between scanners.
